# Supplementary material for: Distinct Geographical Distribution of the Miscanthus Accessions with Varied Biomass Enzymatic Saccharification
Source: PubMed Central journal article supplement (PMC4988763; doi:10.1371/journal.pone.0160026), 2016-08-17
Supplement: pone.0160026.s005.pdf [file pone.0160026.s005.pdf]

**S1 Table.**

|                    |                       | <b>2009 Season</b> |                       |               |
|--------------------|-----------------------|--------------------|-----------------------|---------------|
|                    |                       | <b>Cellulose</b>   | <b>Hemicelluloses</b> | <b>Lignin</b> |
|                    | <b>Cellulose</b>      | 0.521**            |                       |               |
| <b>2010 Season</b> | <b>Hemicelluloses</b> |                    | 0.491**               |               |
|                    | <b>Lignin</b>         |                    |                       | 0.724**       |

\*\* Significant test at  $p < 0.01$ .
