# Supplementary material for: Distinct Geographical Distribution of the Miscanthus Accessions with Varied Biomass Enzymatic Saccharification
Source: PubMed Central journal article supplement (PMC4988763; doi:10.1371/journal.pone.0160026), 2016-08-17
Supplement: pone.0160026.s006.pdf [file pone.0160026.s006.pdf]

**S2 Table.**

| Species                  | Number | 1% NaOH                              | CV%   | 1% H <sub>2</sub> SO <sub>4</sub> | CV%   |
|--------------------------|--------|--------------------------------------|-------|-----------------------------------|-------|
| <i>M.sinensis</i>        | 36     | 57.97*<br>(46.93~71.14) <sup>#</sup> | 11.81 | 39.95<br>(23.44~59.26)            | 18.37 |
| <i>M.floridulus</i>      | 18     | 58.80<br>(49.34~73.79)               | 12.77 | 43.20<br>(35.51~58.45)            | 15.07 |
| <i>M.sacchariflorus</i>  | 26     | 60.97<br>(41.81~78.49)               | 12.63 | 40.62<br>(31.28~47.57)            | 10.87 |
| <i>M.lutarioriparius</i> | 15     | 40.86<br>(28.79~73.90)               | 27.38 | 27.53<br>(16.70~42.63)            | 27.35 |
| Total                    | 95     | 50.27<br>(28.79~78.49)               | 18.51 | 38.79<br>(16.70~59.26)            | 21.06 |

\* Mean value, <sup>#</sup> Minimum and maximum values
